# Supplementary material
Source: PubMed Central journal article supplement (PMC10082088)
Supplement: 41467_2023_37653_MOESM3_ESM.pdf [file 41467_2023_37653_MOESM3_ESM.pdf]

## **Description of Additional Supplementary Files**

File Name: Supplementary Data 1

Description: COVID-19 Phenotyping Lab LOINC codes and Diagnosis ICD10 codes

File Name: Supplementary Data 2

Description: PASC Adult Diagnostic List for Screening

File Name: Supplementary Data 3

Description: Baseline population characteristics with more comorbidities information, INSIGHT and OneFlorida+ cohorts, March 2020 to November 2021

File Name: Supplementary Data 4

Description: Characteristics of PASC-Specific Cohorts on INSIGHT, NYC, March 2020 to November 2021

File Name: Supplementary Data 5

Description: Characteristics of PASC-Specific Cohorts on OneFlorida, Florida, March 2020 to November 2021
